## Notes on techniques and methods for sea water analysis

### Dosage automatique des orthophosphates dans l'eau de mer utilisation de l'AutoAnalyzer ® II

PAUL TREGUER, PIERRE LE CORRE ET PIERRE COURTOT

Laboratoire d'Océanologie Chimique, Université de Bretagne Occidentale  
6, avenue Le Gorgeu, 29283 Brest Cedex, France

A method of automatic analysis of orthophosphates in sea water using the new Technicon AutoAnalyzer II system is described. The manifold allows for the formation and reduction of phosphomolybdate complex. The standard deviation for 8 determinations is less than 0.01  $\mu\text{g-at/l}$  at each level from 0 to 3  $\mu\text{g-at PO}_4\text{-P/l}$ . No interference with ions usually present in sea water has been detected. Results obtained with the automatic method agree very well with those obtained with the manual method, and with a stable base line the system can be linked to a digital printer and allows continuous measurements to be made in oceanographic surveys.

#### Introduction

Le dosage automatique des phosphates dans l'eau de mer est largement utilisé aujourd'hui à bord des navires océanographiques. Les chaînes, couplées au système de traitement de données, sont utilisées en permanence pour des analyses en continu (détection des zones d'"upwelling") ou intensives, compatibles avec les mesures physiques (bathysonde). Il est donc indispensable de disposer d'une méthode précise et sans dérive de ligne de base. Afin de satisfaire à ces exigences, nous avons modifié les techniques décrites pour les appareils antérieurs, afin de les adapter à la nouvelle génération des chaînes Technicon: l'AutoAnalyzer II.

Le phosphore minéral dissous dans l'eau de mer est essentiellement présent sous forme d'ions orthophosphates (surtout sous forme  $\text{HPO}_4^{2-}$  et  $\text{PO}_4^{3-}$  d'après Kester et Pytkowicz (1967)). Les concentrations en pyrophosphates et polyphosphates minéraux sont faible (de l'ordre de 0.1  $\mu\text{g-at/l}$ ) dans les eaux océaniques non polluées (Solorzano et Strickland, 1968).

La réaction de Deniges (1920) est utilisée généralement pour le dosage des orthophosphates dissous dans l'eau de mer selon la technique décrite par Murphy et Riley (1962), où le complexe phosphomolybdique est réduit par l'acide ascorbique.

La définition des conditions opératoires par Strickland et Parsons (1968) leur permet d'atteindre au niveau de 0.3  $\mu\text{g-at/l}$  une déviation standard de 0.02  $\mu\text{g-}$

at/l pour une détermination (précision que nous n'avons pu atteindre cependant, à bord des navires océanographiques).

La technique de Murphy et Riley (1962) a été adaptée à l'analyse automatique par flux continu et en particulier à l'AutoAnalyzer I. Les diverses adaptations réalisées, et en particulier les plus récentes proposées par Coste (1971), Mangelsdorf (1972), Friederich et Whitley (1972) et Hager et al. (1973), mettent en œuvre des conditions de température et d'acidité différentes par rapport à la méthode manuelle.

L'évolution de la technologie des appareils automatiques (AutoAnalyzer II) dans le sens d'une réduction des débits de réactifs et d'échantillons, d'une amélioration notable des colorimètres (stabilité, signal linéaire) a conduit Grasshof (1969) et le constructeur lui-même (Technicon 1973) à proposer de nouvelles adaptations. La formation d'un fin précipité lors du mélange eau de mer-réactif, l'instabilité du réactif, la dérive de la ligne de base rendent cependant leur utilisation difficile pour des mesures répétées lors des campagnes océanographiques actuelles où la valeur définitive de la concentration doit être connue immédiatement après l'analyse.

La méthode que nous avons adaptée à l'AutoAnalyzer II répond à ces exigences et permet de doser 0 à 3  $\mu\text{g-at/l}$  d'orthophosphates, sans interférences notables, avec un seuil de détection de 0.01  $\mu\text{g-at/l}$  et un écart type inférieur à 0.01  $\mu\text{g-at/l}$ .

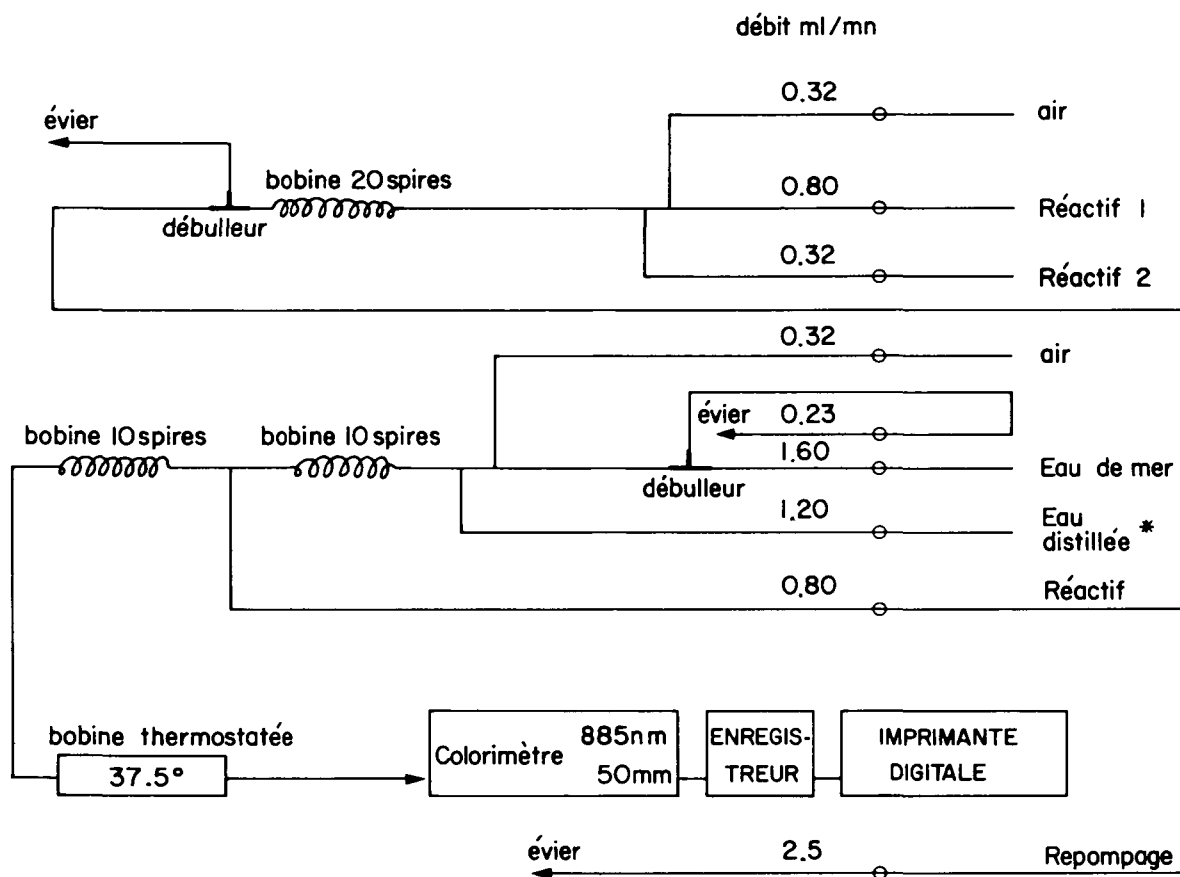

Figure 1. Circuit analytique pour le dosage automatique des orthophosphates dans l'eau de mer.

## Méthode automatique de dosage des orthophosphates dans l'eau de mer

### Circuit analytique

La Figure 1 représente le montage mis en œuvre. Des débits relativement élevés d'eau de mer et des réactifs sont utilisés. Ceci permet d'éviter le phénomène d'adsorption et une meilleure circulation dans la cuve de mesure. Pour les mêmes raisons, l'utilisation de tubes et liaisons en plastique est à éviter en aval du mélange eau de mer-réactif. Il est essentiel de réduire au minimum le nombre de liaisons et d'utiliser des tubes de jonction en verre. Une seule liaison en plastique subsiste à l'entrée de la cuve du colorimètre pour assurer une souplesse suffisante au montage.

Le réactif de Murphy et Riley est stable pendant seulement 8 h. L'adjonction au montage d'un étage de préparation in situ du réactif permet d'éviter cet

inconvenient et d'utiliser le dosage en continu à bord d'un navire.

### Réactifs

Ils sont identiques à ceux utilisés par Technicon (1973). Les solutions sont réalisées à l'aide de produits Merck pour analyses et d'eau distillée.

#### Réactif 1:

Mélanger successivement:

- 500 ml d'acide sulfurique 4.9 N (136 ml d' $H_2SO_4$  concentré, compléter jusqu'à 1000 ml avec de l'eau distillée);
- 150 ml d'une solution d'heptamolybdate d'ammonium (40 g de  $(NH_4)_6 Mo_7 O_{24} \cdot 4 H_2O$ ; compléter jusqu'à 1000 ml avec de l'eau distillée);
- 50 ml d'une solution d'oxotartrate de potassium et d'antimoine (3 g de  $K(SbO)C_4H_4O_6 \cdot 0.5 H_2O$ ; compléter jusqu'à 1000 ml avec de l'eau distillée);

à conserver au congélateur et à dégeler juste avant usage);

**Réactifs 2:**

solution d'acide ascorbique (9 g de  $C_8 H_8 O_6$ ; compléter jusqu'à 500 ml avec de l'eau distillée; à conserver au réfrigérateur; stable pendant plusieurs jours).

**Eau distillée:**

1 ml de Levor IV (Cie Technicon) par litre d'eau distillée.

**Rythme de dosage et de lavage**

Pour les analyses d'échantillons de stations, des godets en plastique de 4.5 ml (préalablement lavés à l'acide puis à l'eau distillée) sont utilisés (échantillonneur type Sampler IV).

Pour les analyses "en continu", lors des prospec-

tions en surface l'eau de mer est pompée dans une cuve à siphon dans laquelle vient tremper l'aiguille de prélèvement.

Le rythme de dosage est de 20 échantillons par heure avec une minute de prélèvement et deux minutes de lavage à l'eau distillée additionnée de Levor IV.

Le retour à la ligne de base entre chaque échantillon est nécessaire pour éliminer l'interférence qui se produirait entre des échantillons successifs en cas de lavage insuffisant. Par rapport au dosage des autres sels nutritifs de l'eau de mer, ceci constitue une exigence particulière. Dans ces conditions, aucune dérive de la ligne de base n'a été constatée.

Le changement de milieu entre chaque échantillon présente cependant l'inconvénient de perturber le signal de mesure pour les échantillons de faibles concentrations (Fig. 2a). La hauteur du pic est mesurée quand le plateau est atteint (Fig. 2a et b).

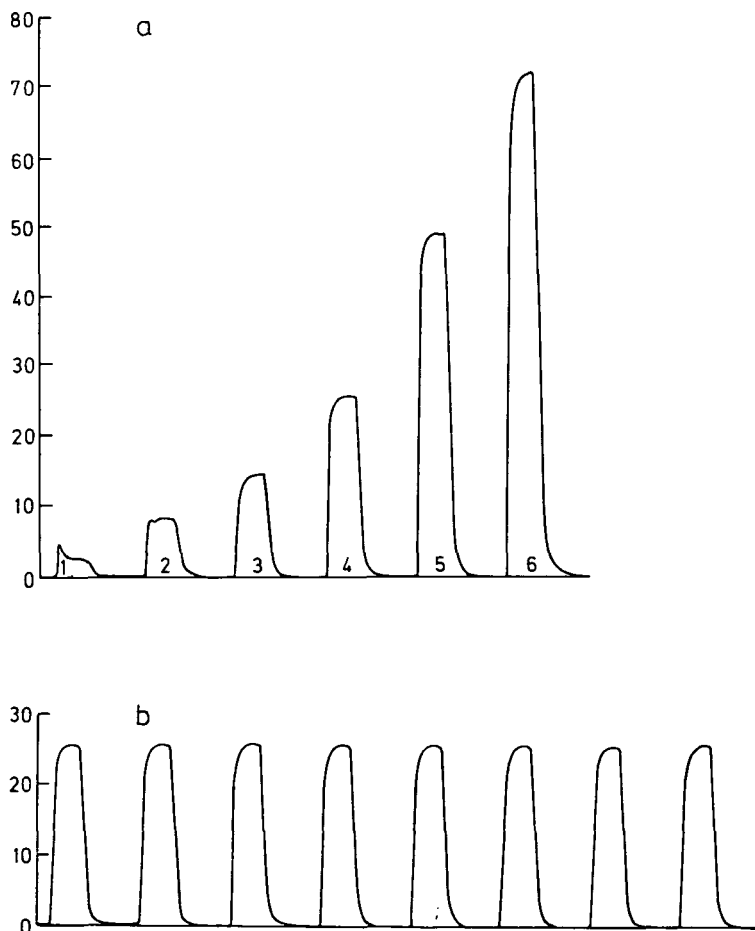

Figure 2. a, Etalonnage pour une eau de mer de référence dans laquelle sont ajoutés 1, 0.00; 2, 0.25; 3, 0.50; 4, 1.00; 5, 2.00; et 6, 3.00  $\mu\text{g-at PO}_4\text{-P/l}$ . b, reproductibilité pour une eau de mer au niveau 1.00  $\mu\text{g-at PO}_4\text{-P/l}$ . Les divisions portées en ordonnée sont arbitraires.

### Etalonnage - Standardisation de l'imprimante digitale

Les solutions standard de  $\text{KH}_2\text{PO}_4$  sont réalisées avec de l'eau de mer pauvre en phosphates selon le mode opératoire décrit par Strickland et Parsons (1968)

Le colorimètre, allumé deux heures avant le début de la manipulation, est utilisé dans les conditions suivantes: standard calibration: 8.00 (densité optique de la pleine échelle 0.18); damp: 1.

#### Standardisation de l'imprimante digitale

La ligne de base est réalisée sur de l'eau distillée. Pendant son passage, l'imprimante digitale est calibrée au 0.00.

Une eau de mer pauvre en phosphate ( $\text{EM}_0$ ) et le standard ( $\text{EM}_0 + 1 \mu\text{g-at PO}_4\text{-P/l}$ ) sont prélevés successivement dans les godets. La concentration en phosphate est déterminée respectivement dans  $\text{EM}_0$  et  $\text{EM}_0 + 1$ . Les valeurs correspondantes sont affichées sur l'imprimante digitale (facteur de calibration 300). La concentration en  $\mu\text{g-at/l}$  des échantillons à doser est alors obtenue directement.

#### Courbe d'étalonnage

La Figure 3 représente la courbe d'étalonnage obtenue dans de l'eau de mer filtrée à  $0.45 \mu\text{m}$ . L'écart

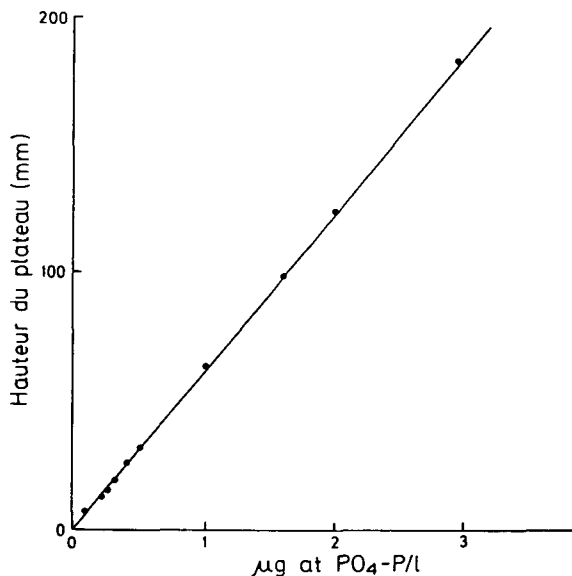

Figure 3. Courbe d'étalonnage pour l'analyse automatique des orthophosphates dans l'eau de mer. La hauteur des plateaux (en mm) varie linéairement en fonction de la concentration en  $\text{PO}_4\text{-P}$  de 0 à  $3 \mu\text{g-at/l}$ .

avec la courbe obtenue dans l'eau distillée n'est pas significatif.

Compte-tenu des dilutions et de la température de mesure, le coefficient d'extinction molaire obtenu est voisin de celui du complexe formé lors de l'analyse manuelle. La loi de Beer-Lambert est vérifiée pour des concentrations habituelles dans l'eau de mer.

#### Interférences

Les ions du type silicate, arséniate, nitrite, cuivre II, fer III ainsi que les autres formes de phosphore minéral (pyro et polyphosphates) sont susceptibles d'intervenir dans la réaction de Deniges.

Une solution de silicates à  $5000 \mu\text{g-at Si/l}$  et de nitrites à  $1250 \mu\text{g-at N/l}$  ne donnent aucune interférence sensible,  $100 \mu\text{g-at Cu/l}$  ou  $1 \mu\text{g-at Fe/l}$  n'ont aucun effet sur la réaction,  $10 \mu\text{g-at As/l}$  donnent un accroissement de densité optique correspondant à  $0.07 \mu\text{g-at P/l}$ .

L'influence des pyro et polyphosphates a également été étudiée. Des échantillons d'eau de mer contenant  $1 \mu\text{g-at PO}_4\text{-P/l}$  de pyrophosphate de sodium et  $100 \mu\text{g}$  de  $(\text{NaPO}_3)_x$  (Sel de Graham) ont été analysés simultanément à des échantillons d'eau de mer de référence. Aucune différence de densité optique n'a été constatée. L'hydrolyse des pyrophosphates et des métaphosphates ne semble donc pas se produire dans les conditions de pH et de température de notre méthode d'analyse automatique.

#### Observations

L'addition d'un tensio-actif (Levor IV), nécessaire pour assurer une bonne hydraulique, provoque lors du mélange avec de l'eau de mer, la formation d'un léger précipité.

#### Dilution de l'eau de mer

Pour éviter la formation du précipité qui entraîne un signal irrégulier, l'eau de mer (pompée à  $1.37 \text{ ml/mn}$ ) est diluée par de l'eau distillée ( $1.20 \text{ ml/mn}$ ). Il en résulte cependant une diminution de la densité optique.

#### Le blanc

La ligne de base est réalisée sur de l'eau distillée de préférence à une eau de mer pauvre en phosphates de façon à disposer d'une référence rigoureusement

constante. La réponse de l'eau distillée sans "Levor IV" est la même et ceci doit être vérifié.

Par rapport à l'eau distillée, une légère absorption à 885 nm est observée quand de l'eau de mer (sans les réactifs) est envoyée dans la cuve de mesure. Cette "turbidité" peut résulter d'une part de l'addition du tensio-actif et d'autre part de la différence des indices de réfraction de l'eau de mer et de l'eau distillée. Elle doit être retranchée de toutes les mesures et déterminée dans les conditions suivantes:

le réactif 1 est remplacé par 500 ml d' $H_2SO_4$  4.9 N dans lesquels on ajoute 200 ml d'eau distillée; et le réactif 2 par de l'eau distillée, une nouvelle ligne de base est obtenue, quand l'aiguille de prélèvement est dans la cuve de lavage. La "turbidité" est alors l'écart entre cette ligne de base et le signal obtenu pour l'eau de mer. Elle varie linéairement avec la salinité. Pour une eau de mer, filtrée à  $0.45 \mu m$ , à 35 ‰, elle est équivalente à  $0.12 \mu g-at/l$  de phosphates. Cependant elle varie selon la géométrie de la cuve de mesure et le réglage optique du colorimètre.

#### Précision

Au niveau de  $0.40 \mu g-at/l$ , l'écart type sur 8 mesures est inférieur à  $0.01 \mu g-at/l$  pour de l'eau de mer filtrée à  $0.45 \mu m$ . Ce résultat est valable pour des teneurs en orthophosphates comprises entre 0 et  $3 \mu g-at/l$ .

#### Comparaison avec la méthode manuelle

Divers prélèvements d'eau de mer du Golfe de Gascogne ont été analysés simultanément par notre méthode et par la méthode manuelle décrite par Strickland et Parsons (1968). La Figure 4 donne les résultats obtenus.

La droite de régression a pour équation:

$$(PO_4)_{\text{automatique}} = 0.985 (PO_4)_{\text{manuelle}} + 0.017$$

Le coefficient de corrélation est  $r = 0.99$ .

Aucun écart significatif n'existe donc entre les deux méthodes pour les échantillons analysés.

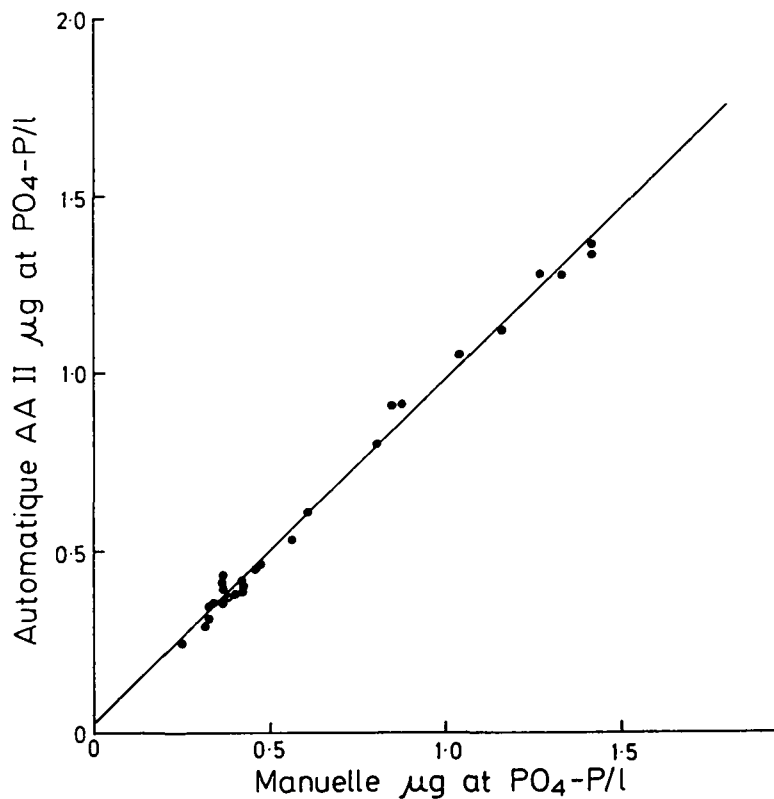

Figure 4. Comparaison des concentrations obtenues par les méthodes manuelle et automatique.

## Conclusion

La méthode automatique que nous avons adaptée à l'AutoAnalyzer II (Technicon) permet de doser des teneurs en orthophosphates de 0 à 3  $\mu\text{g-at/l}$  à raison de 20 échantillons par heure. La stabilité de la ligne de base permet son utilisation en continu, en relation avec une imprimante digitale qui donne directement la concentration.

La bonne reproductibilité de la méthode et sa précision permettent des mesures convenables dans la zone euphotique où de basses teneurs sont mesurées en période d'épuisement en sels nutritifs. Le dosage du phosphore organique dissous est également possible bien que la différence entre les teneurs en phosphore total et en orthophosphates soit faible (de l'ordre de 0.10  $\mu\text{g-at/l}$ ).

Cette technique fait partie d'un ensemble d'analyses des sels nutritifs (nitrate, nitrite, ion ammonium, silicate) mis en oeuvre par notre laboratoire (Treguer et Le Corre (1974)), sur le NO "Jean Charcot" lors des campagnes CINECA ("upwelling" marocain et mauritanien) et dans le Golfe de Gascogne.

## References

- Coste, B. 1971. Circulation et évolution des composés de l'azote et du phosphore (en particulier des sels nutritifs) dans le bassin occidental de la Méditerranée.
- Influence sur la production organique. Thèse d'Etat, Université d'Aix-Marseille, CNRS AO 4495.
- Deniges, M. G. 1920. Réaction de coloration extrêmement sensible des phosphates et des arsénates. Ses applications. C. R. Acad. Sci., Paris, 171: 802-4.
- Friedrich, G. O. & Whitley, T. E. 1972. Autoanalyzer procedures for nutrients. In *Phytoplankton growth dynamics*. Spec. Rep. Dep. Oceanogr. Univ. Wash., 52, 38-60.
- Grasshof, K. 1969. A simultaneous multiple channel system for nutrient analysis in seawater with analog and digital data record. Technicon International Congress, June 4-6, Chicago, 133-45.
- Hager, S. W., Atlas, E. L., Gordon, L. I., Mantyla, A. W. & Park, P. K. 1973. A comparison at sea of manual and Autoanalyzer analyses of phosphate, nitrate and silicate. *Limnol. Oceanogr.*, 17: 931-37.
- Kester, D. R. & Pytkowicz, R. M. 1967. Determination of the apparent dissociation constants of phosphoric acid in seawater. *Limnol. Oceanogr.*, 12: 243-52.
- Mangelsdorf, P. 1972. Methodische Verbesserungen der Phosphat-Bestimmung in Meerwasser mit dem Auto-Analyzer insbesondere für den Bordbetrieb. *Helgoländer Wiss. Meerunters.*, 23: 376-82.
- Murphy, J. & Riley, J. P. 1962. A modified single solution method for the determination of phosphate in natural waters. *Anal. Chim. Acta*, 27: 31-6.
- Solorzano, L. & Strickland, J. D. H. 1968. Polyphosphate in seawater. *Limnol. Oceanogr.*, 13: 515-18.
- Strickland, J. D. H. & Parsons, T. R. 1968. A practical handbook of seawater analysis. *Bull. Fish. Res. Bd Can.*, 167, pp. 49-55.
- Technicon, 1973. Orthophosphate in water and seawater. Industrial method No 155-71 W/tentative.
- Treguer, P., Le Corre, P. 1974. Dosage des sels nutritifs (nitrate, nitrite, ammonium, silicate, phosphate) dans l'eau de mer. Utilisation de l'AutoAnalyzer II. Laboratoire d'Océanologie Chimique, Université de Bretagne Occidentale. 59 pp.
